# Supplementary material
Source: PubMed Central journal article supplement (PMC6918009)
Supplement: NIHMS1532968-supplement-1.pdf [file NIHMS1532968-supplement-1.pdf]

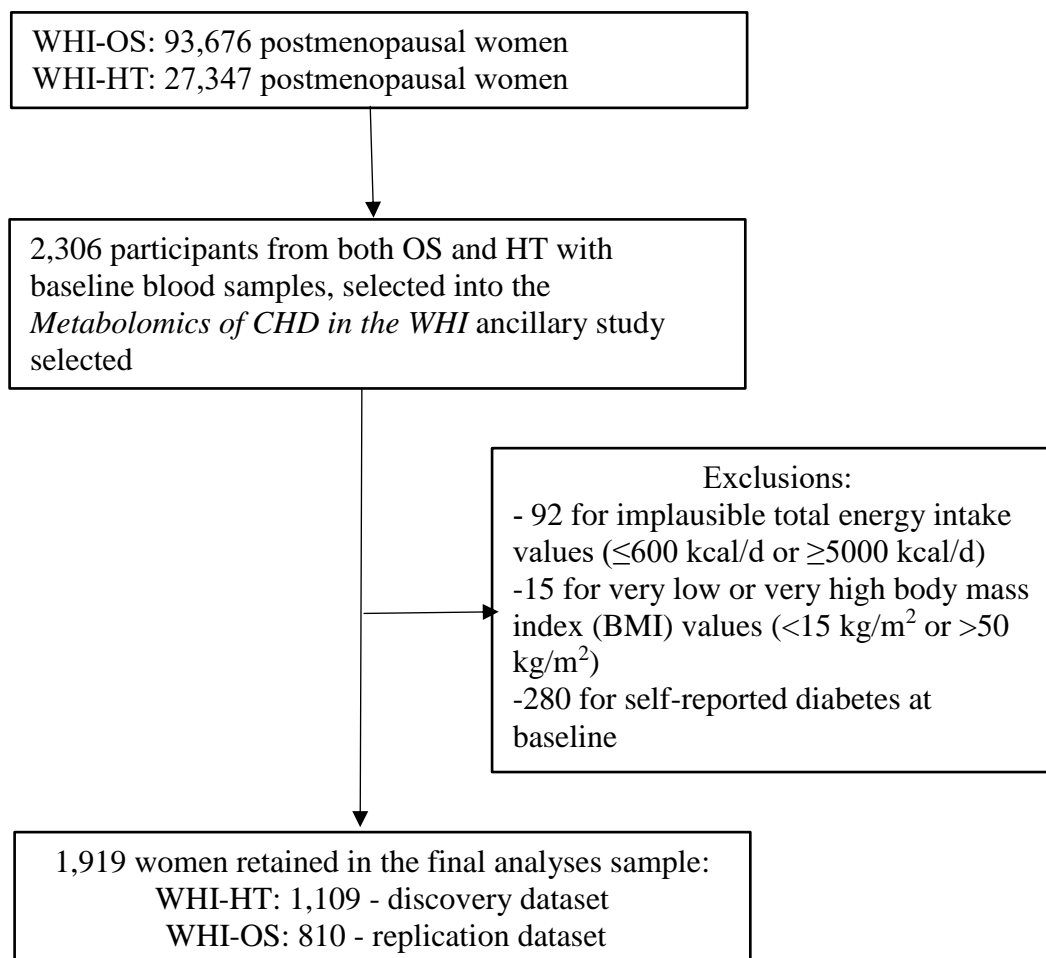

Supplemental Figure 1. Flow chart of sample selection and inclusion of participants into final analytical sample

Supplemental Table 1. Twenty-six metabolites were significantly associated with EDIP at the raw  $P$ -value  $<0.05$ , and none at FDR-adjusted  $P < 0.10$ , among normal weight women in the discovery dataset (Hormone Therapy trial:  $n=317$ )<sup>1,2,3</sup>

| Metabolite                           | HMDB ID     | Association with EDIP score |                   |                   | Association with CRP     |                   |                   |
|--------------------------------------|-------------|-----------------------------|-------------------|-------------------|--------------------------|-------------------|-------------------|
|                                      |             | Beta estimate<br>(95%CI)    | Raw<br>$P$ -value | FDR<br>$P$ -value | Beta estimate<br>(95%CI) | Raw<br>$P$ -value | FDR<br>$P$ -value |
| Trigonelline                         | HMDB0000875 | -0.97 (-1.51, -0.43)        | 0.0004            | 0.194             | -0.01 (-0.12, 0.11)      | 0.920             | 0.920             |
| 5-acetylamino-6-amino-3-methyluracil | HMDB0004400 | -0.72 (-1.25, -0.19)        | 0.008             | 0.694             | -0.0004 (-0.11, 0.11)    | 0.995             | 0.995             |
| Glycine                              | HMDB0000123 | -0.60 (-1.16, -0.05)        | 0.034             | 0.723             | -0.11 (-0.22, 0.01)      | 0.070             | 0.315             |
| Caffeine                             | HMDB0001847 | -0.59 (1.15, 0.03)          | 0.038             | 0.723             | 0.03 (-0.08, 0.15)       | 0.571             | 0.681             |
| C18:3 CE                             | HMDB0010370 | -0.72 (-1.26, -0.18)        | 0.009             | 0.694             | -0.03 (-0.14, 0.08)      | 0.582             | 0.685             |
| C20:5 CE                             | HMDB0006731 | -0.68 (-1.23, -0.13)        | 0.016             | 0.723             | -0.02 (-0.13, 0.09)      | 0.740             | 0.740             |
| C36:4 PE                             | HMDB0008937 | -0.67 (-1.19, -0.14)        | 0.013             | 0.723             | 0.02 (-0.09, 0.14)       | 0.670             | 0.719             |
| C20:1 LPE                            | HMDB0011512 | 0.78 (0.22, 1.33)           | 0.006             | 0.694             | -0.08 (-0.19, 0.03)      | 0.161             | 0.438             |
| C12 carnitine                        | HMDB0002250 | 0.64 (0.06, 1.22)           | 0.031             | 0.723             | 0.12 (0.01, 0.24)        | 0.037             | 0.221             |
| C12:1 carnitine                      | HMDB0013326 | 0.66 (0.10, 1.23)           | 0.022             | 0.723             | 0.14 (0.03, 0.26)        | 0.014             | 0.165             |
| C14:1 carnitine                      | HMDB0002014 | 0.68 (0.09, 1.26)           | 0.023             | 0.723             | 0.14 (0.02, 0.26)        | 0.019             | 0.176             |
| C14:2 carnitine                      | HMDB0013331 | 0.65 (0.07, 1.23)           | 0.027             | 0.723             | 0.13 (0.02, 0.25)        | 0.023             | 0.186             |
| C18:1 carnitine                      | HMDB0005065 | 0.56 (0.04, 1.09)           | 0.035             | 0.723             | 0.03 (-0.07, 0.14)       | 0.522             | 0.680             |
| C34:0 PS                             | HMDB0012356 | -0.61 (-1.17, -0.06)        | 0.029             | 0.723             | -0.01 (-0.12, 0.10)      | 0.861             | 0.861             |
| C36:5 PC                             | HMDB0007890 | -0.62 (-1.16, -0.08)        | 0.024             | 0.723             | -0.03 (-0.14, 0.08)      | 0.636             | 0.709             |
| C38:1 PC                             | HMDB0008268 | 0.64 (0.08, 1.20)           | 0.024             | 0.723             | -0.06 (-0.18, 0.05)      | 0.280             | 0.550             |
| C38:4 PC<br>plasmalogen-A            | HMDB0011252 | 0.59 (0.05, 1.13)           | 0.033             | 0.723             | 0.03 (-0.08, 0.14)       | 0.544             | 0.680             |
| C36:0 DAG                            | HMDB0007158 | -0.84 (-1.61, -0.07)        | 0.033             | 0.723             | -0.03 (-0.19, 0.13)      | 0.714             | 0.723             |
| C51:3 TAG                            | HMDB0043062 | 0.68 (0.11, 1.24)           | 0.019             | 0.723             | 0.04 (-0.07, 0.16)       | 0.474             | 0.654             |
| C54:2 TAG                            | HMDB0005403 | 0.55 (0.02, 1.07)           | 0.041             | 0.753             | 0.07 (-0.04, 0.17)       | 0.219             | 0.497             |
| C54:3 TAG                            | HMDB0005405 | 0.63 (0.05, 1.20)           | 0.033             | 0.723             | 0.03 (-0.09, 0.14)       | 0.648             | 0.711             |
| C54:4 TAG                            | HMDB0005370 | 0.61 (0.01, 1.22)           | 0.046             | 0.753             | 0.02 (-0.10, 0.15)       | 0.689             | 0.719             |
| C56:3 TAG                            | HMDB0005410 | 0.55 (0.03, 1.07)           | 0.037             | 0.723             | 0.04 (-0.07, 0.14)       | 0.455             | 0.641             |
| Myristoleic acid                     | HMDB0002000 | 0.83 (0.28, 1.38)           | 0.003             | 0.694             | 0.01 (-0.11, 0.12)       | 0.922             | 0.922             |

|           |             |                    |       |       |                    |       |       |
|-----------|-------------|--------------------|-------|-------|--------------------|-------|-------|
| Linoleate | HMDB0000673 | 0.87 (0.24, 1.49)  | 0.007 | 0.694 | 0.17 (0.06, 0.31)  | 0.004 | 0.09  |
| Urate     | HMDB0000289 | -0.63 (1.25, 0.02) | 0.044 | 0.753 | 0.07 (-0.05, 0.20) | 0.267 | 0.539 |

<sup>1</sup>All values are beta estimates obtained from multivariable-adjusted linear regression modeling 5-SD increments in EDIP or 5-unit increments in CRP as the main predictor of interest and metabolite as the main response variable of interest.

<sup>2</sup>Models were adjusted for body mass index (continuous) age, physical activity, educational level, race/ethnicity, aspirin/NSAIDs use, smoking status, WHI Hormone Therapy trial arm, CHD case-control status.

<sup>3</sup>Statistical significance was defined as false-discovery rate adjusted  $p < 0.10$ .

Supplemental Table 2. Forty-five metabolites were significantly associated with EDIP at an FDR-adjusted  $P < 0.10$ , among overweight or obese women in the discovery dataset (Hormone Therapy trial:  $n = 792$ )<sup>1,2,3</sup>

| Metabolite                           | HMDB ID     | Association with EDIP score |                        | Association with CRP        |                        |
|--------------------------------------|-------------|-----------------------------|------------------------|-----------------------------|------------------------|
|                                      |             | Beta estimate<br>(95%CI)    | FDR<br><i>P</i> -value | Beta estimate<br>(95%CI)    | FDR<br><i>P</i> -value |
| Trigonelline                         | HMDB0000875 | -1.43 (-1.74, -1.12)        | 2.48 E-16              | <b>-0.08 (-0.13, -0.03)</b> | <b>0.016</b>           |
| 5-acetylamino-6-amino-3-methyluracil | HMDB0004400 | -0.73 (-1.03, -0.43)        | 1.89 E-04              | -0.03 (-0.08, 0.02)         | 0.249                  |
| 1,7-dimethyluric acid                | HMDB0011103 | -0.59 (-0.90, -0.28)        | 0.014                  | -0.02 (-0.07, 0.03)         | 0.413                  |
| Caffeine                             | HMDB0001847 | -0.41 (-0.71, -0.12)        | 0.074                  | -0.04 (-0.08, 0.01)         | 0.204                  |
| 3-methylxanthine                     | HMDB0001886 | -0.58 (-0.91, -0.26)        | 0.019                  | -0.03 (-0.08, 0.02)         | 0.349                  |
| 7-methylxanthine                     | HMDB0001991 | -0.56 (-0.89, -0.24)        | 0.026                  | -0.02 (-0.08, 0.03)         | 0.393                  |
| C20:1 LPC                            | HMDB0010391 | -0.62 (-0.99, -0.25)        | 0.026                  | <b>-0.11 (-0.17, -0.05)</b> | <b>0.002</b>           |
| C24:0 LPC                            | HMDB0008038 | -0.50 (-0.83, -0.16)        | 0.060                  | <b>-0.12 (-0.17, -0.07)</b> | <b>1.93 E-04</b>       |
| C18:3 LPC                            | HMDB0010387 | -0.54 (-0.91, -0.17)        | 0.066                  | <b>-0.15 (-0.21, -0.09)</b> | <b>3.22 E-05</b>       |
| C18:2 LPC                            | HMDB0010386 | -0.42 (-0.75, -0.09)        | 0.086                  | <b>-0.18 (-0.23, -0.13)</b> | <b>2.43 E-09</b>       |
| C20:5 LPC                            | HMDB0010397 | -0.40 (-0.74, -0.07)        | 0.086                  | <b>-0.18 (-0.23, -0.13)</b> | <b>2.34 E-09</b>       |
| C36:0 PC                             | HMDB0008036 | -0.44 (-0.77, -0.10)        | 0.081                  | -0.05 (-0.11, 0.001)        | 0.115                  |
| C37:4 PC                             | HMDB0008625 | -0.41 (-0.75, -0.07)        | 0.086                  | <b>-0.07 (-0.13, -0.02)</b> | <b>0.032</b>           |
| C38:2 PE                             | HMDB0008942 | -0.43 (-0.77, -0.10)        | 0.081                  | <b>-0.09 (-0.14, -0.04)</b> | <b>0.007</b>           |
| C18:1 LPE                            | HMDB0011506 | -0.43 (-0.79, -0.07)        | 0.094                  | <b>-0.13 (-0.19, -0.07)</b> | <b>1.87 E-04</b>       |
| Uracil                               | HMDB0000300 | -0.57 (-0.92, -0.23)        | 0.026                  | -0.02 (-0.07, 0.04)         | 0.493                  |
| Uridine                              | HMDB0000296 | -0.48 (-0.80, -0.16)        | 0.060                  | 0.04 (-0.02, 0.09)          | 0.243                  |
| Glycine                              | HMDB0000123 | -0.38 (-0.70, -0.60)        | 0.090                  | <b>-0.14 (-0.19, -0.09)</b> | <b>1.74 E-06</b>       |
| Cortisol                             | HMDB0000063 | -0.56 (-0.90, -0.23)        | 0.026                  | 0.003 (-0.05, 0.06)         | 0.917                  |
| C14:0 SM                             | HMDB0012097 | -0.45 (-0.79, -0.11)        | 0.081                  | 0.01 (-0.05, 0.06)          | 0.843                  |
| C20:0 SM                             | HMDB0012102 | -0.51 (-0.87, -0.15)        | 0.074                  | 0.01 (-0.05, 0.06)          | 0.857                  |
| C22:1 SM                             | HMDB0012104 | -0.45 (-0.80, -0.10)        | 0.081                  | -0.01 (-0.07, 0.04)         | 0.610                  |
| C24:0 SM                             | HMDB0011697 | -0.43 (-0.78, -0.08)        | 0.086                  | -0.003 (-0.06, 0.05)        | 0.913                  |
| C24:1 SM                             | HMDB0012107 | -0.44 (-0.77, -0.11)        | 0.081                  | 0.05 (0.001, 0.11)          | 0.104                  |
| Sebacate                             | HMDB0000792 | -0.47 (-0.84, -0.10)        | 0.081                  | <b>-0.08 (-0.14, -0.02)</b> | <b>0.032</b>           |

|                 |             |                      |       |                              |              |
|-----------------|-------------|----------------------|-------|------------------------------|--------------|
| C18:3 CE        | HMDB0010370 | -0.50 (-0.84, -0.17) | 0.060 | -0.06 (-0.11, -0.002)        | 0.099        |
| C20:1 CE        | HMDB0005193 | -0.44 (-0.78, -0.09) | 0.081 | <b>-0.08 (-0.14, -0.02)</b>  | <b>0.019</b> |
| C24H38O5        | NA          | 0.42 (0.08, 0.77)    | 0.086 | <b>-0.06 (-0.11, -0.002)</b> | <b>0.100</b> |
| Linoleate       | HMDB0000673 | 0.50 (0.14, 0.85)    | 0.074 | 0.04 (-0.01, 0.10)           | 0.206        |
| Isoleucine      | HMDB0000172 | 0.43 (0.12, 0.73)    | 0.074 | <b>0.08 (0.03, 0.13)</b>     | <b>0.007</b> |
| C12:1 carnitine | HMDB0013326 | 0.47 (0.14, 0.80)    | 0.074 | 0.04 (-0.01, 0.10)           | 0.206        |
| C56:8 TAG       | HMDB0005392 | 0.61 (0.27, 0.95)    | 0.019 | 0.003 (-0.05, 0.06)          | 0.920        |
| C52:3 TAG       | HMDB0005384 | 0.47 (0.13, 0.81)    | 0.074 | 0.01 (-0.05, 0.06)           | 0.817        |
| C50:1 TAG       | HMDB0044109 | 0.43 (0.12, 0.74)    | 0.074 | 0.05 (-0.003, 0.10)          | 0.133        |
| C52:2 TAG       | HMDB0005369 | 0.44 (0.12, 0.76)    | 0.074 | 0.03 (-0.02, 0.08)           | 0.356        |
| C50:2 TAG       | HMDB0005377 | 0.41 (0.09, 0.72)    | 0.081 | 0.04 (-0.01, 0.09)           | 0.243        |
| C56:5 TAG       | HMDB0005406 | 0.47 (0.10, 0.84)    | 0.081 | <b>-0.07 (-0.13, -0.01)</b>  | <b>0.062</b> |
| C34:0 DAG       | HMDB0007100 | 0.42 (0.11, 0.73)    | 0.080 | 0.01 (-0.04, 0.06)           | 0.650        |
| C34:2 DAG       | HMDB0007103 | 0.39 (0.07, 0.71)    | 0.086 | 0.02 (-0.03, 0.07)           | 0.440        |
| C36:0 DAG       | HMDB0007158 | 0.43 (0.08, 0.78)    | 0.086 | -0.02 (-0.08, 0.04)          | 0.484        |
| Proline         | HMDB0000162 | 0.41 (0.08, 0.74)    | 0.086 | -0.002 (-0.05, 0.05)         | 0.934        |
| Piperine        | HMDB0029377 | 0.41 (0.08, 0.78)    | 0.086 | -0.01 (-0.06, 0.04)          | 0.730        |
| Cholate isomer  | NA          | 0.42 (0.08, 0.76)    | 0.086 | 0.04 (-0.02, 0.09)           | 0.248        |
| Indoxylsulfate  | HMDB0000682 | 0.41 (0.07, 0.75)    | 0.086 | -0.04 (-0.09, 0.01)          | 0.229        |

<sup>1</sup>All values are beta estimates obtained from multivariable-adjusted linear regression modeling 5-SD increments in EDIP or 5-unit increments in CRP as the main predictor of interest and metabolite as the main response variable of interest. Metabolite associations in **bold face** are those that were also significantly associated with CRP at FDR-adjusted  $P < 0.10$ .

<sup>2</sup>Models were adjusted for body mass index (continuous) age, physical activity, educational level, race/ethnicity, aspirin/NSAIDs use, smoking status, WHI Hormone Therapy trial arm, CHD case-control status.

<sup>3</sup>Statistical significance was defined as false-discovery rate adjusted  $p < 0.10$ .

Supplemental Table 3. Sixteen of the forty-five metabolites discovered (FDR-adjusted  $P < 0.10$ ) among overweight or obese women in the Hormone Therapy trial, were replicated at FDR-adjusted  $P < 0.05$  in the Observational Study ( $n=497$ )<sup>1,2,3</sup>

| Metabolite                           | HMDB ID     | Association with EDIP score |                        | Association with CRP        |                        |
|--------------------------------------|-------------|-----------------------------|------------------------|-----------------------------|------------------------|
|                                      |             | Beta estimate<br>(95%CI)    | FDR<br><i>P</i> -value | Beta estimate<br>(95%CI)    | FDR<br><i>P</i> -value |
| Trigonelline                         | HMDB0000875 | -1.31 (-1.72, -0.90)        | 1.22 E-08              | 0.01 (-0.05, 0.06)          | 0.795                  |
| 1,7-dimethyluric acid                | HMDB0011103 | -0.77 (-1.23, -0.31)        | 0.003                  | <b>0.07 (0.01, 0.13)</b>    | <b>0.052</b>           |
| 7-methylxanthine                     | HMDB0001991 | -0.68 (-1.11, -0.24)        | 0.004                  | -0.02 (-0.07, 0.03)         | 0.622                  |
| 3-methylxanthine                     | HMDB0001886 | -0.64 (-1.07, -0.20)        | 0.006                  | 0.01 (-0.04, 0.07)          | 0.716                  |
| 5-acetylamino-6-amino-3-methyluracil | HMDB0004400 | -0.65 (-1.10, -0.21)        | 0.006                  | -0.03 (-0.08, 0.03)         | 0.511                  |
| Caffeine                             | HMDB0001847 | -0.54 (-0.99, -0.10)        | 0.017                  | <b>0.10 (0.05, 0.16)</b>    | <b>0.001</b>           |
| Glycine                              | HMDB0000123 | -0.43 (-0.84, -0.01)        | 0.043                  | <b>-0.13 (-0.18, -0.09)</b> | <b>4.96 E-06</b>       |
| C18:3 CE                             | HMDB0010370 | -0.53 (-0.97, -0.09)        | 0.017                  | -0.01 (-0.06, 0.04)         | 0.773                  |
| C20:1 CE                             | HMDB0005193 | 0.01 (-0.39, 0.42)          | 0.946                  | -0.06 (-0.11, -0.01)        | 0.052                  |
| C14:0 SM                             | HMDB0012097 | -0.48 (-0.90, -0.06)        | 0.025                  | -0.01 (-0.04, 0.06)         | 0.773                  |
| C20:0 SM                             | HMDB0012102 | -0.04 (-0.46, 0.37)         | 0.834                  | 0.02 (-0.03, 0.07)          | 0.575                  |
| C22:0 SM                             | HMDB0012103 | -0.08 (-0.51, 0.34)         | 0.703                  | 0.04 (-0.02, 0.09)          | 0.318                  |
| C22:1 SM                             | HMDB0012104 | -0.07 (-0.50, 0.36)         | 0.746                  | -0.01 (-0.06, 0.04)         | 0.773                  |
| C24:0 SM                             | HMDB0011697 | -0.32 (-0.76, 0.12)         | 0.152                  | -0.01 (-0.06, 0.04)         | 0.773                  |
| C24:1 SM                             | HMDB0012107 | -0.13 (-0.58, 0.33)         | 0.576                  | 0.04 (-0.02, 0.09)          | 0.318                  |
| C18:2 LPC                            | HMDB0010386 | -0.41 (-0.84, 0.02)         | 0.061                  | <b>-0.12 (-0.17, -0.07)</b> | <b>6.61 E-05</b>       |
| C18:3 LPC                            | HMDB0010387 | -0.34 (-0.75, 0.07)         | 0.106                  | -0.06 (-0.11, -0.01)        | 0.087                  |
| C20:1 LPC                            | HMDB0010391 | -0.35 (-0.72, 0.03)         | 0.073                  | <b>-0.07 (-0.11, -0.02)</b> | <b>0.019</b>           |
| C20:5 LPC                            | HMDB0010397 | -0.41 (-0.84, 0.01)         | 0.058                  | <b>-0.11 (-0.17, -0.06)</b> | <b>1.15 E-04</b>       |
| C24:0 LPC                            | HMDB0008038 | -0.26 (-0.67, 0.15)         | 0.218                  | -0.12 (-0.17, -0.07)        | 3.79 E-05              |
| C36:0 PC                             | HMDB0008036 | -0.15 (-0.60, 0.31)         | 0.527                  | 0.02 (-0.02, 0.07)          | 0.455                  |
| C37:4 PC                             | HMDB0008625 | 0.15 (-0.27, 0.58)          | 0.482                  | 0.02 (-0.03, 0.07)          | 0.622                  |
| C18:1 LPE                            | HMDB0011506 | -0.18 (-0.58, 0.23)         | 0.388                  | -0.02 (-0.07, 0.03)         | 0.622                  |

|                 |             |                     |       |                          |                  |
|-----------------|-------------|---------------------|-------|--------------------------|------------------|
| C38:2 PE        | HMDB0008942 | -0.04 (-0.46, 0.38) | 0.836 | -0.04 (-0.08, 0.02)      | 0.318            |
| Uracil          | HMDB0000296 | -0.36 (-0.78, 0.07) | 0.097 | -0.04 (-0.09, 0.01)      | 0.281            |
| C24H38O5        | NA          | -0.29 (-0.72, 0.15) | 0.195 | 0.03 (-0.03, 0.08)       | 0.481            |
| Uridine         | HMDB0000300 | -0.25 (-0.68, 0.18) | 0.251 | -0.05 (-0.11, -0.002)    | 0.110            |
| Cortisol        | HMDB0000063 | -0.24 (-0.68, 0.19) | 0.277 | -0.02 (-0.08, 0.03)      | 0.524            |
| Proline         | HMDB0000162 | -0.14 (-0.60, 0.31) | 0.539 | 0.01 (-0.04, 0.07)       | 0.773            |
| Indoxylsulfate  | HMDB0000682 | -0.13 (-0.58, 0.33) | 0.587 | -0.05 (-0.11, 0.003)     | 0.162            |
| Linoleate       | HMDB0000673 | 0.55 (0.10, 0.99)   | 0.017 | 0.04 (-0.01, 0.10)       | 0.270            |
| Sebacate        | HMDB0000792 | 0.25 (-0.17, 0.68)  | 0.241 | 0.04 (-0.01, 0.09)       | 0.281            |
| C34:0 DAG       | HMDB0007100 | 0.58 (0.08, 1.08)   | 0.024 | <b>0.07 (0.01, 0.13)</b> | <b>0.093</b>     |
| C34:2 DAG       | HMDB0007103 | 0.69 (0.25, 1.13)   | 0.004 | <b>0.08 (0.02, 0.13)</b> | <b>0.019</b>     |
| C36:0 DAG       | HMDB0007158 | 0.12 (-0.25, 0.49)  | 0.523 | 0.02 (-0.02, 0.07)       | 0.455            |
| C50:1 TAG       | HMDB0044109 | 0.72 (0.28, 1.16)   | 0.003 | <b>0.11 (0.05, 0.16)</b> | <b>7.75 E-04</b> |
| C50:2 TAG       | HMDB0005377 | 0.63 (0.18, 1.09)   | 0.008 | <b>0.11 (0.05, 0.16)</b> | <b>0.001</b>     |
| C52:2 TAG       | HMDB0005369 | 0.76 (0.34, 1.19)   | 0.003 | <b>0.09 (0.04, 0.14)</b> | <b>0.002</b>     |
| C52:3 TAG       | HMDB0005384 | 0.69 (0.27, 1.10)   | 0.003 | <b>0.11 (0.05, 0.16)</b> | <b>0.006</b>     |
| C56:5 TAG       | HMDB0005406 | 0.38 (-0.06, 0.07)  | 0.093 | -0.03 (-0.08, 0.02)      | 0.430            |
| C56:8 TAG       | HMDB0005392 | 0.10 (-0.28, 0.47)  | 0.614 | -0.03 (-0.08, 0.01)      | 0.281            |
| Isoleucine      | HMDB0000172 | 0.10 (-0.32, 0.52)  | 0.628 | 0.06 (0.01, 0.11)        | 0.092            |
| Cholate isomer  | NA          | 0.37 (-0.05, 0.79)  | 0.082 | -0.01 (-0.07, 0.04)      | 0.709            |
| C12:1 carnitine | HMDB0013326 | 0.05 (-0.39, 0.50)  | 0.811 | 0.04 (-0.01, 0.09)       | 0.318            |
| Piperine        | HMDB0029377 | -0.02 (-0.44, 0.40) | 0.931 | 0.03 (-0.02, 0.08)       | 0.408            |

<sup>1</sup>All values are beta estimates obtained from multivariable-adjusted linear regression modeling 5-SD increments in EDIP or 5-unit increments in CRP as the main predictor of interest and metabolite as the main response variable of interest. Metabolite associations in **bold face** are the EDIP replicated associations (FDR-adjusted  $P < 0.10$ ) that were also significantly associated with CRP at FDR-adjusted  $P < 0.10$ .

<sup>2</sup>Models were adjusted for body mass index (continuous) age, physical activity, educational level, race/ethnicity, aspirin/NSAIDs use, smoking status, WHI Hormone Therapy trial arm, CHD case-control status.

<sup>3</sup>Statistical significance was defined as false-discovery rate adjusted  $p < 0.10$ .
